# Supplementary material for: Patient-Reported Experience Measures for Colonoscopy: A Systematic Review and Meta-Ethnography
Source: MDPI journal article supplement (doi:10.3390/diagnostics12020242), 2022-01-19
Supplement: s1 [file s1]

**Table S2.** Overview of how each included study have contributed to the five main concepts and the Line of Argument.

| Studies                   | Health motivation<br>n=10 | Discomfort<br>n=13 |        |       | Information<br>n=11 |        |       | Care relationship<br>n=11 |        |       | Understanding<br>n=9 |        |       |
|---------------------------|---------------------------|--------------------|--------|-------|---------------------|--------|-------|---------------------------|--------|-------|----------------------|--------|-------|
|                           | Overall                   | Before             | During | After | Before              | During | After | Before                    | During | After | Before               | During | After |
| Hafeez et al. [33]        |                           |                    | √      |       |                     | √      | √     |                           |        |       |                      |        |       |
| Kimura et al. [34]        | √                         | √                  |        |       |                     |        |       |                           | √      |       | √                    |        |       |
| Kirkegaard et al. [35]    | √                         | √                  | √      |       |                     | √      | √     |                           | √      |       |                      |        |       |
| Mikocka-Walus et al. [36] | √                         | √                  |        |       | √                   |        | √     |                           | √      |       | √                    |        | √     |
| Neilson et al. [37]       |                           | √                  | √      |       | √                   |        | √     |                           | √      |       | √                    |        |       |
| Restall et al. [38]       | √                         | √                  |        |       | √                   |        | √     |                           | √      |       | √                    |        | √     |
| Rollbusch et al. [39]     | √                         |                    | √      |       | √                   |        | √     |                           | √      |       | √                    |        | √     |
| Rosvall et al. [32]       | √                         | √                  | √      | √     | √                   | √      | √     |                           | √      |       | √                    |        | √     |
| Shamim et al. [40]        | √                         | √                  | √      |       | √                   |        | √     |                           | √      |       | √                    |        | √     |
| Sultan et al. [41]        | √                         | √                  |        |       |                     |        |       |                           |        |       | √                    |        |       |
| Thygesen et al. [42]      | √                         | √                  | √      |       |                     |        | √     |                           | √      |       |                      |        |       |
| von Wagner et al. [43]    | √                         |                    | √      |       |                     | √      | √     |                           | √      |       |                      |        |       |
| Wangmar et al. [44]       |                           | √                  | √      | √     | √                   | √      |       |                           | √      |       | √                    |        | √     |
